# Supplementary material for: Recommendations for services for people living with chronic breathlessness in advanced disease: Results of a transparent expert consultation
Source: PubMed Central journal article supplement — Chron Respir Dis. 2018 Dec 30;16:1479973118816448. doi: 10.1177/1479973118816448 (PMC6313262; doi:10.1177/1479973118816448), 2018-12-30
Supplement: TEC_Supplementary_Material.pdf [file TEC_Supplementary_Material.pdf]

## Supplementary Material

### Recommendations for services for people with living with chronic breathlessness in advanced disease: results of a transparent expert consultation

Lisa Jane Brighton, India Tunnard, Morag Farquhar, Sara Booth, Sophie Miller, Deokhee Yi, Wei Gao, Sabrina Bajwah, William D-C. Man, Charles C Reilly, Margaret Ogden, Sylvia Bailey, Colleen Ewart, Irene J Higginson, Matthew Maddocks

Supplementary Figure S1: Prompt Questions for group work booklets

| Defining and delivering services                                                                                                                                                                                                                                                                                                                                                                                                                                                                                                                                                                                    | Integration into current practice                                                                                                                                                                                                                                                                                                                                                                                                                                                                                                                                                          | Measuring & monitoring services                                                                                                                                                                                                                                                                                                                                                                                                                                                                                                              |
|---------------------------------------------------------------------------------------------------------------------------------------------------------------------------------------------------------------------------------------------------------------------------------------------------------------------------------------------------------------------------------------------------------------------------------------------------------------------------------------------------------------------------------------------------------------------------------------------------------------------|--------------------------------------------------------------------------------------------------------------------------------------------------------------------------------------------------------------------------------------------------------------------------------------------------------------------------------------------------------------------------------------------------------------------------------------------------------------------------------------------------------------------------------------------------------------------------------------------|----------------------------------------------------------------------------------------------------------------------------------------------------------------------------------------------------------------------------------------------------------------------------------------------------------------------------------------------------------------------------------------------------------------------------------------------------------------------------------------------------------------------------------------------|
| <ul style="list-style-type: none"> <li>• What are the core components of a holistic breathlessness service?</li> <li>• Which staff should lead and contribute to a holistic breathlessness service?</li> <li>• Who should be referred to holistic breathlessness services, and when?</li> <li>• What is the optimal contact time, and over what duration, for a holistic breathlessness service?</li> <li>• Where should a holistic breathlessness service be positioned and delivered?</li> <li>• What future research is needed around the definition and delivery of holistic breathlessness service?</li> </ul> | <ul style="list-style-type: none"> <li>• Where should a holistic breathlessness service be based?</li> <li>• Which services should contribute to a holistic breathlessness service?</li> <li>• How should people be referred to a holistic breathlessness service?</li> <li>• How do we best raise awareness of a holistic breathlessness service?</li> <li>• What could help facilitate integration of holistic breathlessness services into current practice?</li> <li>• What future research is needed around integration of holistic breathlessness services into practice?</li> </ul> | <ul style="list-style-type: none"> <li>• What is the ideal set of outcomes to measure for patients?</li> <li>• What is the ideal set of outcomes to measure for carers?</li> <li>• What is the ideal set of service-level variables to monitor?</li> <li>• What data will need to be collected to inform commissioning?</li> <li>• What could help facilitate measurement and monitoring of success?</li> <li>• What future research is needed around measurement and monitoring the success of holistic breathlessness services?</li> </ul> |

Supplementary Table S1: Professions/Roles of those invited to participate in the online survey (n=160)

| Profession/Role                 | Invited |      |
|---------------------------------|---------|------|
|                                 | n       | (%)  |
| Doctor (clinical)               | 61      | 37.4 |
| Researcher                      | 65      | 39.8 |
| Physiotherapist                 | 12      | 7.4  |
| Patient/Carer representative    | 16      | 10   |
| Role in charitable organisation | 9       | 5.5  |
| Nurse                           | 11      | 6.7  |
| Commissioner                    | 5       | 3    |
| Occupational Therapist          | 1       | 0.6  |
| Psychologist                    | 5       | 3    |
| Other                           | 10      | 6.1  |

Note: potential participants could be assigned more than one profession/role
